# Supplementary material for: Structure of the homodimeric androgen receptor ligand-binding domain
Source: PubMed Central journal article supplement (PMC5303882; doi:10.1038/ncomms14388), 2017-02-06
Supplement: ncomms14388-s1.pdf [file ncomms14388-s1.pdf]

**a**

Higher flexibility

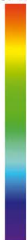

Lower flexibility

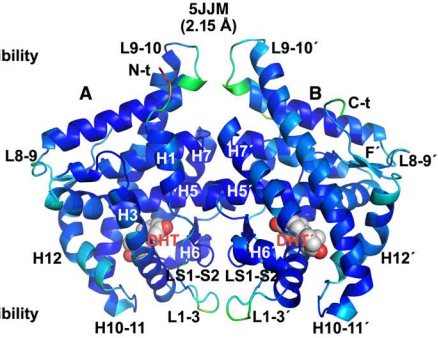**B factors ( $\text{\AA}^2$ ):**

|                             | A     | B     | Dimer |
|-----------------------------|-------|-------|-------|
| Average protein (Av. prot): | 36.45 | 36.04 | 36.24 |
| Minimum (Min):              | 21.91 | 22.98 | 21.91 |
| Maximum (Max):              | 71.58 | 65.97 | 71.58 |

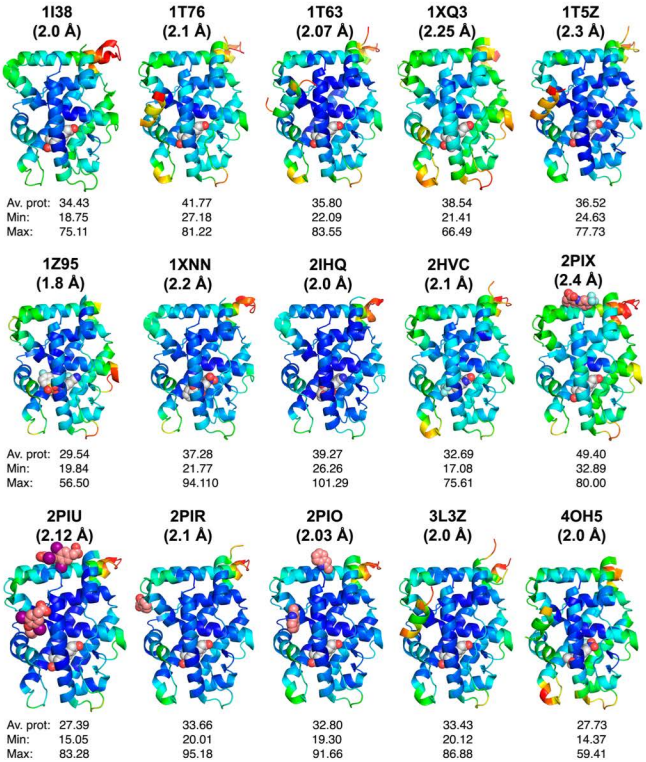

**Supplementary Figure 1 | Comparison of the temperature factors of the AR-LBD in the monomeric and homodimeric crystal forms.**

(a) The AR-LBD dimer is represented as a cartoon colored according to the average temperature factors (B-factors) of each residue. The 'left' monomer is shown in the standard orientation, i.e. with helix H1 and the AF-2 groove facing the viewer. (b) A selection of 15 monomeric AR-LBD structures deposited in the PDB to date and refined to a similar resolution as the current crystal structure. The structures are identified by their PDB codes, and original papers describing these structures are cited in Supplementary References<sup>1-11</sup>. The regions of the protein structure with higher mobility/flexibility are highlighted with warmer colors, those that exhibit lower flexibility/higher stability with colder colors. (B factors were taken as deposited in the corresponding PDB entries, without further manipulations). Notice the overall stabilization of the helical bundle in the AR-LBD homodimer. By contrast, the monomeric form exhibits enhanced flexibility in the L1-3, L9-10 and L4-5 loops, as well as in helix H5, the C-terminal end of H9, and the start of H10.

**a**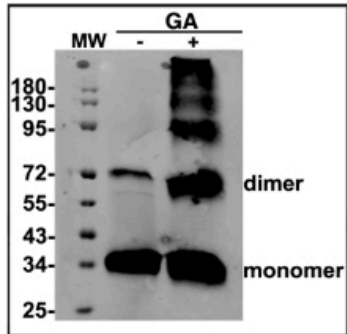**b**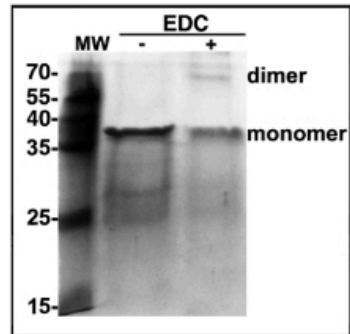**c**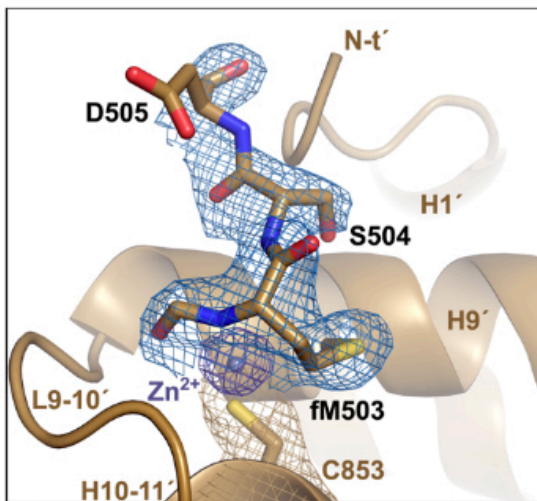**d**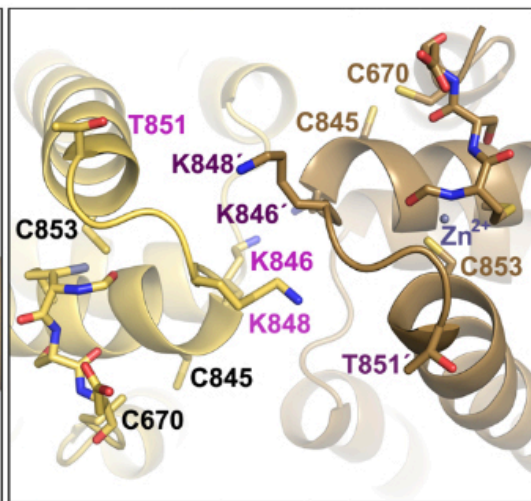**e**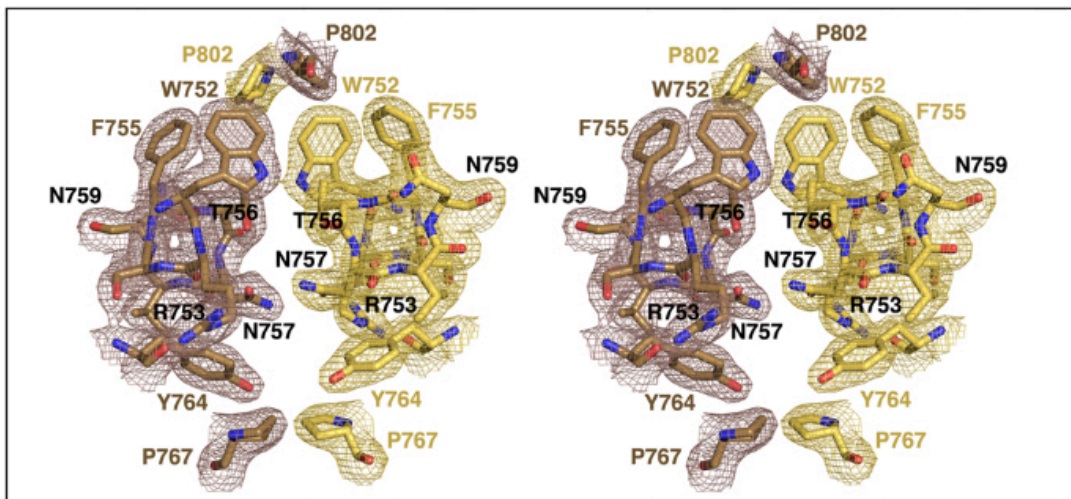

**Supplementary Figure 2 | Demonstration of AR-LBD dimer formation in solution and details of the dimer interface.**

(a) Results of the cross-linking of AR-LBD with glutaraldehyde. A Western blot is shown demonstrating rapid formation of an AR-LBD dimer, along with higher-order multimers. (b) Results of the incubation of AR-LBD with the zero-length crosslinker, EDC. Notice appearance of a faint band with a relative molecular mass corresponding to the AR-LBD dimer. (c) Closeup of the dimerization interface around residue C853 from monomer B. Notice the presence of extra electron density, which has been tentatively interpreted as a divalent cation coordinated by the S $\gamma$  atom, and in addition surrounded by a formylated peptide, probably stemming from recombinant AR-LBD itself. Notice also the close proximity of C687 residues from the two core monomers, B and C. The final electron density map contoured at  $1\sigma$  is shown. (d) Post-translational modifications cluster around the L9-10 loop. Closeup of the AR-LBD dimer interface centered on the L9-10 loops. Note that residues K846 and K848 are known to be ubiquitinated<sup>12</sup>, whereas phosphorylation of S792 and T851 has been reported<sup>13</sup>. This is in addition to disulfide bridge formation between cysteine residues at positions 670 and 845 (See ref.<sup>14</sup> and our own unpublished observations). (e) Stereo closeup showing major interactions across the interface of the core dimer composed by the arbitrarily labeled molecules B (in yellow) and C (in brown). Electron density is shown as either a brown or yellow mesh contoured at  $1\sigma$ .

**a**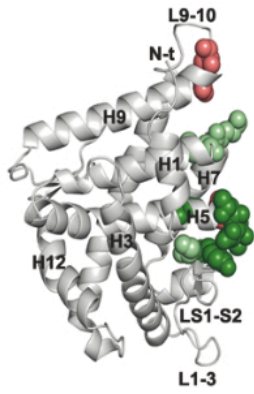**b**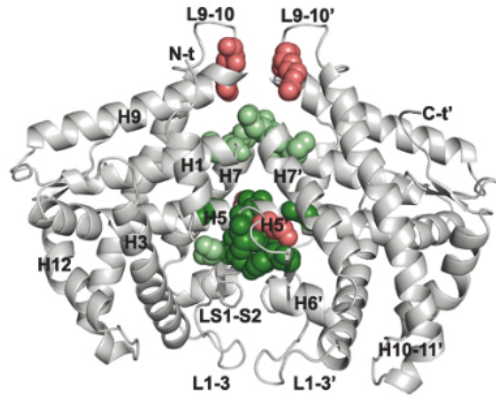**c**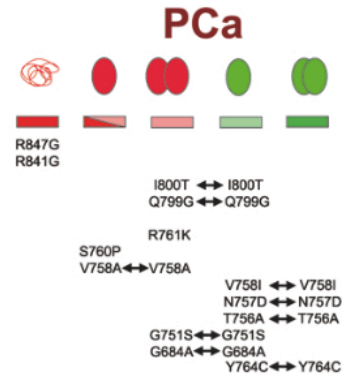**d**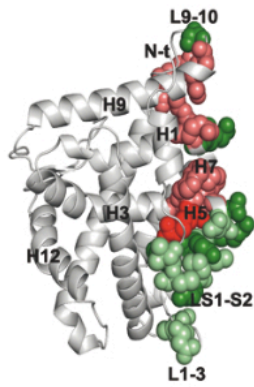**e**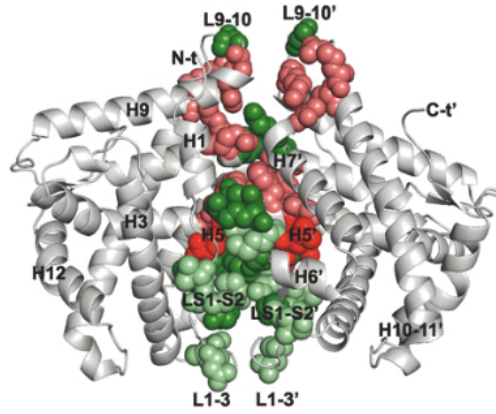**f**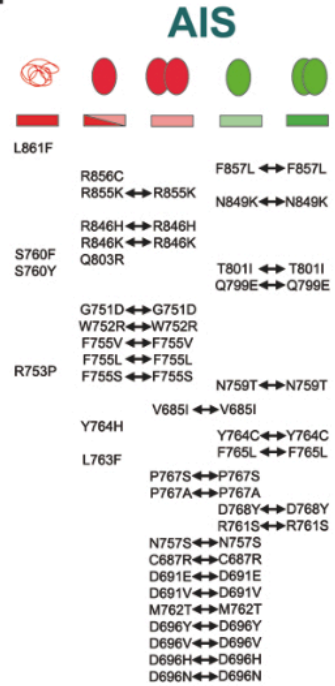

**Supplementary Figure 3 | Predicted effects of PCa/AIS-linked mutations on AR-LBD structure and stability.**

Monomeric (**a, d**) and dimeric (**b, e**) AR-LBD structures are represented as cartoons colored light gray. Residues whose mutations have been associated with PCa (**a, b**) or AIS (**d, e**) are shown with all their non-hydrogen side chain atoms depicted as spheres, colored according to the predicted effect of the exchange on protein folding: dark green (more stable AR-LBD dimer), light green (increased monomer stability), salmon (local structural disorder of the monomer or less active/inactive dimer), or red (local or overall structural disorder of the AR-LBD monomer). Notice that mutations cluster at the dimer interface identified in the current crystal structure. (**c, f**) Consensus classification of the predicted effects of PCa or AIS-linked mutations on protein stability obtained with various independent computational tools.

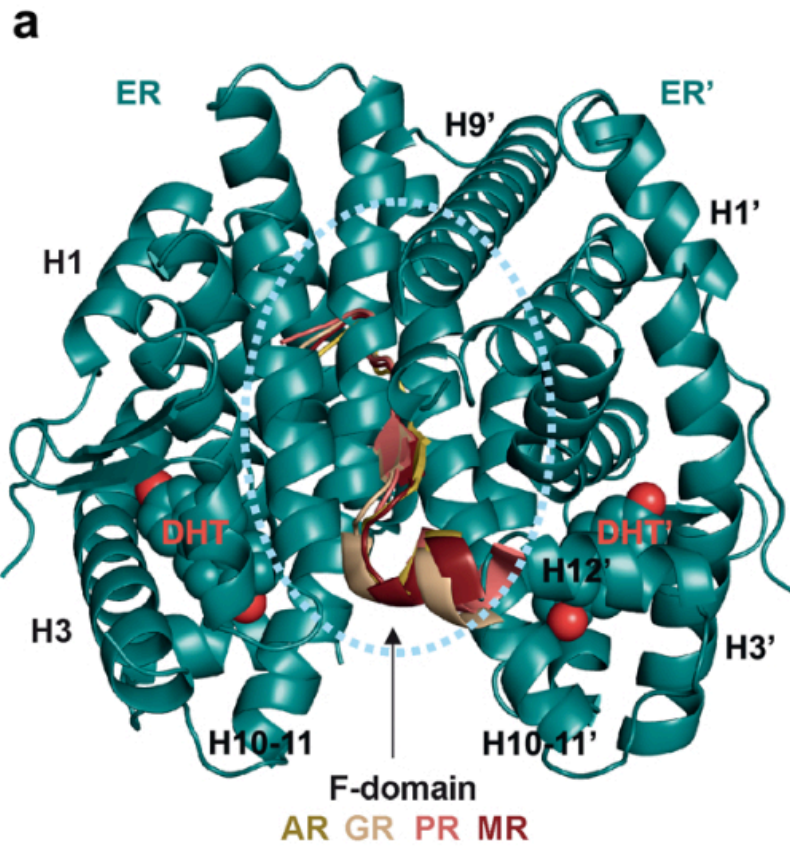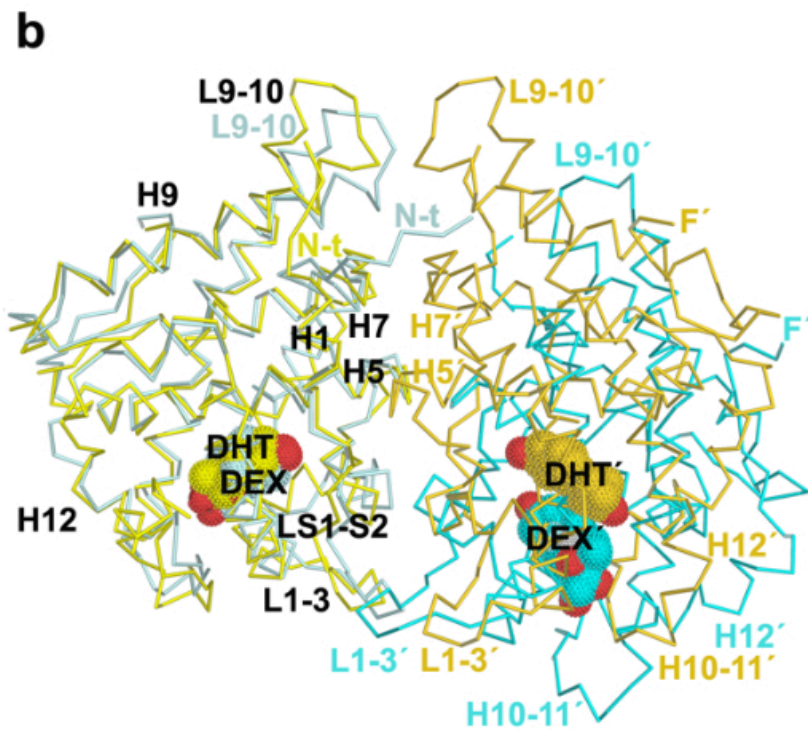

**Supplementary Figure 4 | Comparison of the current AR-LBD homodimer with previous structures of steroid receptors.**

(a) Structure of the canonical ER $\alpha$  dimer, shown as a blue cartoon. The C-terminal end of helix H12 and the F-domain of AR (yellow; PDB: 1T7T), GR (light brown; PDB: 1M2Z), PR (salmon; PDB: 1A28) and MR (dark red; 2A3I) are overlaid onto the homodimeric ER structure. Notice that oxosteroid NRs cannot dimerize according to the canonical scheme if the F-domain is wrapped up around the LBD surface.

(b) Overlay of the C $\alpha$  traces of AR-LBD and GR-LBD (PDB code 1M2Z) homodimers. The two monomers are shown in yellow and gold and in gray and blue, respectively. Notice that the GR-LBD might easily adopt the symmetric head-to-head conformation seen in the current AR-LBD structure by a simple rotation towards the 2-fold axis (indicated with a curved arrow), accompanied by minor rearrangements of the L9-10 loop and of some interface side chains.



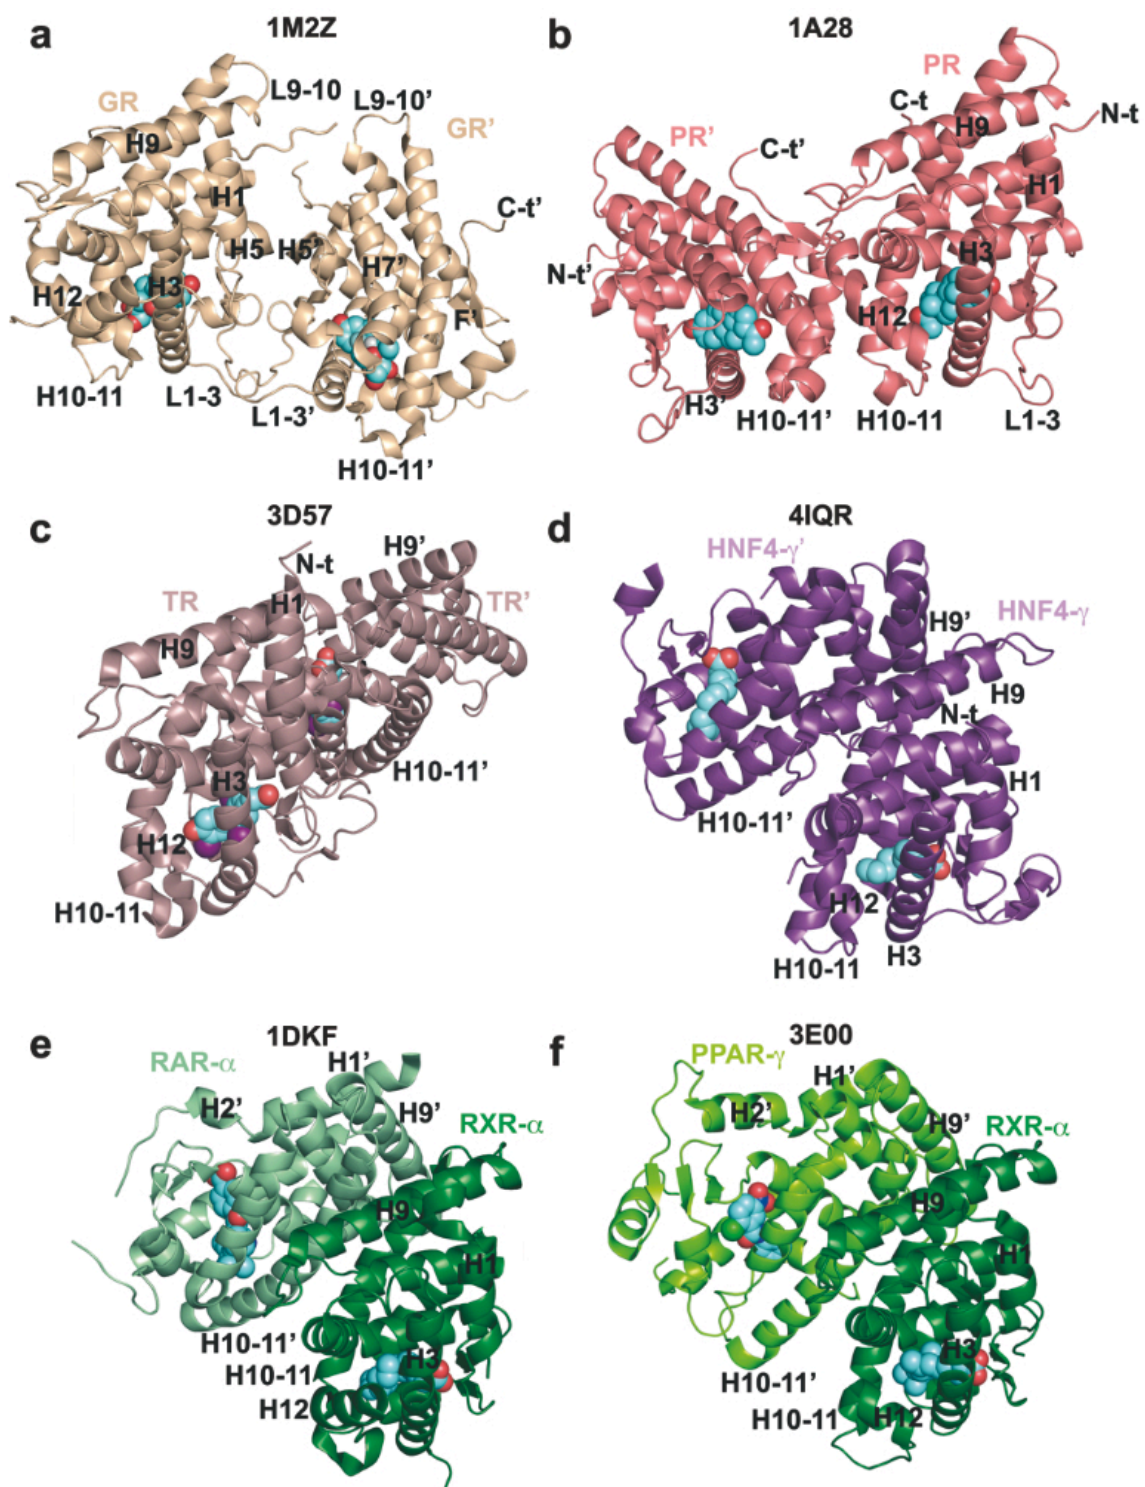

**Supplementary Figure 5 | Comparison of the AR-LBD with homo- and heterodimers of non-steroid nuclear receptors.**

Cartoon representation of the previously reported structures of the dimers of (a) GR-LBD (PDB code 1M2Z), (b) PR-LBD (1A28; notice that the AF-2 groove would be occluded in this arrangement, casting doubts about its physiological relevance), (c) TR $\beta$  (3D57), (d) HNF4 $\alpha$  (4IQR), (e) RXR $\alpha$ -RAR $\alpha$  (1DKF), and (f) PPAR $\gamma$ -RXR $\alpha$  (3E00). The individual domains are colored pale brown (GR), pink (PR), saddle brown (TR $\beta$ ), purple (HNF4 $\alpha$ ), forest green (RXR $\alpha$ ), olive (RAR $\alpha$ ), and lawn green (PPAR $\gamma$ ). The corresponding ligands are shown as color-coded spheres (carbon, aquamarine blue; red, oxygen). Notice that the TR $\beta$  homodimer differs from the canonical dimers shown in panels (d) – (f). The pathological relevance of point mutations that map to the C-terminal end of helix H5 and neighboring areas for generalized thyroid hormone resistance (GTHR) suggests that the TR-LBD homodimer might adopt an AR-like head-to-head conformation in solution.

**a**

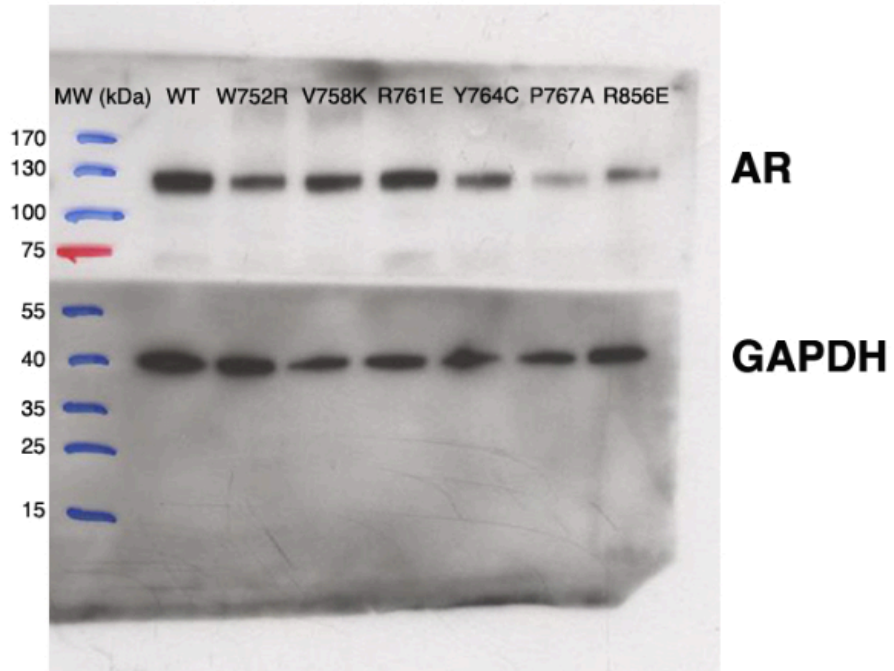

**b**

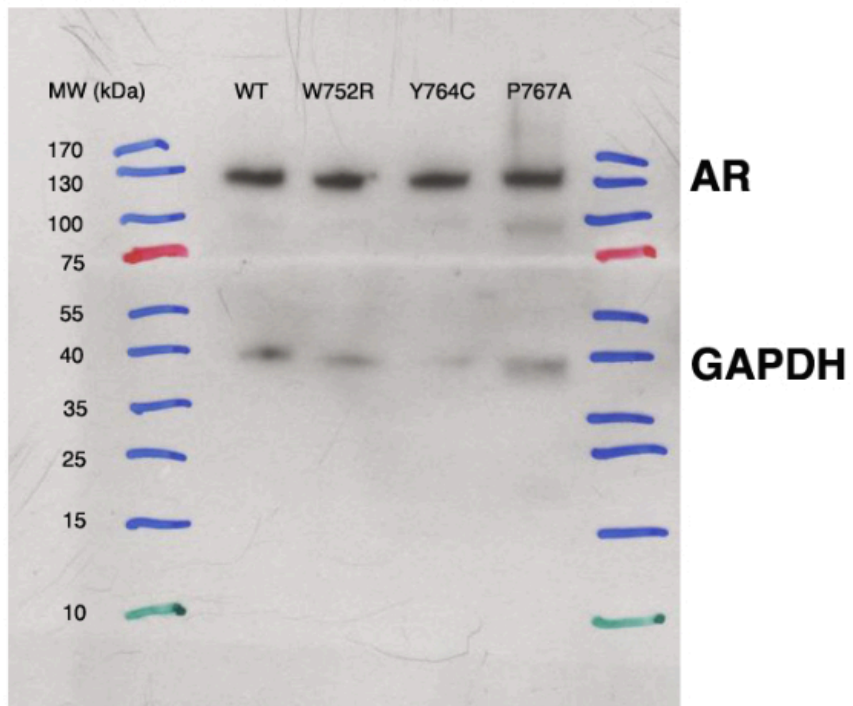

**Supplementary Figure 6 | Uncropped scans of the Western blots shown in Figure 5d,e.**

## Supplementary Tables

**Supplementary Table 1 (ST1): Summary of BMOE-crosslinked peptides identified by mass spectrometry.**

| Peak     | m/z      | [M+H] <sup>+</sup><br>(exp.) | [M+H] <sup>+</sup><br>(calc.) | δ(ppm) | Peptide 1                  | Crosslinker | Peptide 2                     |
|----------|----------|------------------------------|-------------------------------|--------|----------------------------|-------------|-------------------------------|
| BMOE3_6  | 1191.034 | 4761.113                     | 4761.074                      | 8.26   | [EAIEPGVVVCGHDNNQPDSF]     | BMOE*       | [NVLEAIEPGVVVCGHDNNQPDSF]     |
| BMOE3_7  | 1191.033 | 4761.11                      | 4761.074                      | 7.49   | [EAIEPGVVVCGHDNNQPDSF]     | BMOE*       | [NVLEAIEPGVVVCGHDNNQPDSF]     |
| BMOE3_8  | 1369.148 | 5473.569                     | 5473.522                      | 8.53   | [NVLEAIEPGVVVCGHDNNQPDSF]  | BMOE**      | [NVLEAIEPGVVVCGHDNNQPDSFAALL] |
| BMOE3_10 | 1206.048 | 4821.168                     | 4821.132                      | 7.65   | [EAIEPGVVVCGHDNNQPDSF]     | BMOE**      | [EAIEPGVVVCGHDNNQPDSFAALL]    |
| BMOE3_11 | 1379.661 | 5515.620                     | 5515.569                      | 9.25   | [EAIEPGVVVCGHDNNQPDSFAALL] | BMOE**      | [NVLEAIEPGVVVCGHDNNQPDSFAALL] |
| BMOE1_15 | 1191.032 | 4761.104                     | 4761.074                      | 6.36   | [EAIEPGVVVCGHDNNQPDSF]     | BMOE*       | [NVLEAIEPGVVVCGHDNNQPDSF]     |
| BMOE1_17 | 1195.533 | 4779.108                     | 4779.085                      | 4.97   | [EAIEPGVVVCGHDNNQPDSF]     | BMOE**      | [NVLEAIEPGVVVCGHDNNQPDSF]     |
| BMOE1_18 | 1287.597 | 5147.365                     | 5147.327                      | 7.42   | [NVLEAIEPGVVVCGHDNNQPDSF]  | BMOE**      | [EAIEPGVVVCGHDNNQPDSFAALL]    |

\*Incorporates a water molecule at the basic pH used for chymotrypsinolysis.

\*\*Incorporates two water molecules at the basic pH used for chymotrypsinolysis.

**Supplementary Table 2 (ST2): Topologically equivalent interface residues in steroid receptors and in the TR $\beta$ .**

| AR   | PR   | GR   | MR   | ER   | TR   |
|------|------|------|------|------|------|
| P850 | G862 | S709 | S914 | T496 | -    |
| K848 | K860 | N707 | N913 | L495 | -    |
| K846 | R859 | R704 | C910 | A493 | K356 |
| R847 | Q860 | E705 | N912 | G494 | -    |
| R855 | S865 | Q710 | Q916 | Q499 | H362 |
| R856 | R869 | R714 | R920 | R503 | F363 |
| Q859 | Q872 | Q717 | Q923 | Q506 | K366 |
| Q799 | Q812 | Q657 | Q863 | N439 | N310 |
| T801 | S814 | S659 | T866 | Q441 | L311 |
| Q803 | E816 | E661 | E867 | E443 | E315 |
| F755 | Y768 | Y613 | Y819 | M396 | Y267 |
| N759 | S772 | S617 | N823 | P399 | P269 |
| V758 | V771 | S616 | T822 | H398 | -    |
| N757 | H770 | Q615 | H821 | H398 | -    |
| T756 | K769 | R614 | K820 | -    | -    |
| P802 | Q815 | S659 | F866 | G442 | -    |
| W752 | W765 | W610 | W816 | W393 | V265 |
| R753 | R766 | R611 | R817 | R394 | R266 |
| M762 | M775 | L620 | F826 | K401 | T273 |
| Y764 | Y777 | C622 | Y828 | L403 | T275 |
| P767 | P780 | P625 | P831 | P406 | E279 |
| C687 | Y700 | Y545 | Y751 | F328 | -    |
| D768 | D781 | D626 | D832 | N406 | -    |
| N692 | N705 | S550 | S756 | -    | D195 |
| N693 | T706 | S551 | S757 | -    | P193 |
| D691 | D704 | D549 | D755 | -    | L192 |
| Q694 | K707 | V552 | K758 | -    | -    |
| P695 | P706 | P553 | P759 | F337 | -    |

**Supplementary Table 3 (ST3): Bioinformatics analysis of AIS-associated mutations.**

| AIS<br>Residue | CUPSAT                 |                                    |              |                        |                                    | SDM          |                        |                                    |           |                        | PolyPhen<br>program<br>Score | Istable<br>Score | Folding RaCe<br>Dimer Monomer |       |                                    |           |
|----------------|------------------------|------------------------------------|--------------|------------------------|------------------------------------|--------------|------------------------|------------------------------------|-----------|------------------------|------------------------------|------------------|-------------------------------|-------|------------------------------------|-----------|
|                | DIMER                  |                                    |              | MONOMER                |                                    | DIMER        |                        |                                    | MONOMER   |                        |                              |                  |                               |       |                                    |           |
|                | Effect on<br>stability | $\Delta\Delta G$<br>(Kcal/<br>mol) | Torsion      | Effect on<br>stability | $\Delta\Delta G$<br>(Kcal/<br>mol) | Torsion      | Effect on<br>stability | $\Delta\Delta G$<br>(Kcal/<br>mol) | % Solvent | Effect on<br>stability |                              |                  |                               |       | $\Delta\Delta G$<br>(Kcal/<br>mol) | % Solvent |
| V685I          | ↓                      | -1,06                              | Favourable   | ↑                      | 5,69                               | Unfavourable | ↓                      | -0,03                              | 18        | ↑                      | 0,04                         | 77               | 0,917                         | 73,52 | 0,79                               | 0,33      |
| C687R          | ↓                      | -1,33                              | Unfavourable | ↓                      | -0,07                              | Unfavourable | ↓                      | -0,75                              | 54        | ↓                      | -0,83                        |                  | 0,997                         |       | -1,14                              | -1,14     |
| D691V          | ↓                      | -0,28                              | Favourable   | ↑                      | 0,62                               | Favourable   | ↑                      | 1,1                                | 68        | ↑                      | 1,10                         | 71               | 1                             | 60,37 | -1,51                              |           |
| D691E          | ↓                      | -1,9                               | Unfavourable | ↓                      | -0,54                              | Unfavourable | ↓                      | 0,02                               | 68        | ↑                      | 0,02                         | 71               | 0,994                         | 60,37 | -1,58                              | -1,58     |
| D696H          | ↓                      | -0,74                              | Unfavourable | ↓                      | -0,47                              | Favourable   | ↑                      | 1,45                               | 23        | ↑                      | 1,45                         | 21               | 1                             | 27,06 | 6,52                               | 6,52      |
| D696N          | ↑                      | 0,99                               | Favourable   | ↑                      | 0,10                               | Favourable   | ↓                      | -0,33                              | 23        | ↓                      | -0,33                        | 21               | 0,999                         | 27,06 | -0,03                              | -0,03     |
| D696Y          | ↓                      | -0,55                              | Unfavourable | ↓                      | -1,37                              | Unfavourable | ↑                      | 1,51                               | 23        | ↑                      | 1,51                         | 21               | 1                             | 27,06 | 1,32                               | 1,32      |
| D696V          | ↓                      | -1,05                              | Unfavourable | ↓                      | -0,30                              | Unfavourable | ↑                      | 0,8                                | 23        | ↑                      | 0,80                         | 21               | 0,999                         | 27,06 | 1,35                               | 1,35      |
| G751D          | ↑                      | 0,64                               | Unfavourable | ↑                      | 0,64                               | Unfavourable | ↓                      | -0,35                              | 1,2       | ↓                      | -0,34                        | 1,1              | 1                             | 0,00  | 5,21                               | 5,21      |
| W752R          | ↓                      | -3,24                              | Favourable   | ↓                      | -3,28                              | Favourable   | ↓                      | -2,64                              | 8,2       | ↓                      | -2,50                        | 17               | 1                             | 17,05 | -3,57                              | -2,80     |
| R753Q          | ↑                      | 1,22                               | Favourable   | ↓                      | -0,10                              | Unfavourable | ↓                      | -1,33                              | 15,4      | ↓                      | -0,45                        | 30               | 1                             | 25,76 | -0,17                              | -0,71     |
| R753P          |                        |                                    |              | ↑                      | 0,17                               | Unfavourable | ↓                      | -3,44                              | 15,4      | ↓                      | -2,28                        | 30               | 1                             | 25,76 | 1,65                               | 1,65      |
| F755V          | ↓                      | -1,02                              | Favourable   | ↓                      | -0,86                              | Favourable   | ↓                      | -0,48                              | 11        | ↓                      | -0,33                        | 29               | 0,994                         | 24,90 | -0,30                              | -2,39     |
| F755S          | ↓                      | -2,81                              | Unfavourable | ↓                      | -1,83                              | Favourable   | ↓                      | -4,3                               | 11        | ↓                      | -3,05                        | 29               | 1                             | 24,90 | -1,89                              | -1,55     |
| F755L          | ↓                      | -2,38                              | Favourable   | ↓                      | -1,86                              | Favourable   | ↑                      | 0,34                               | 11        | ↑                      | 0,29                         | 29               | 0,971                         | 24,90 | -0,18                              | -0,02     |
| N757S          | ↓                      | -1,33                              | Favourable   | ↑                      | 0,32                               | Unfavourable | ↓                      | -0,58                              | 23        | ↓                      | -0,58                        | 41               | 0,97                          | 75,14 | -0,47                              | -2,10     |
| N759T          | ↓                      | -1,12                              | Unfavourable | ↓                      | -1,27                              | Unfavourable | ↓                      | -2,36                              | 22        | ↑                      | 0,09                         | 85               | 0,981                         | 5,97  | -1,13                              | -0,50     |
| S760F          | ↓                      | -4,43                              | Unfavourable | ↓                      | -0,13                              | Unfavourable | ↑                      | 1,51                               | 5         | ↑                      | 1,53                         | 4                | 1                             | 5,97  | -1,99                              | -1,99     |
| S760Y          | ↓                      | -7,73                              | Unfavourable | ↓                      | -0,93                              | Unfavourable | ↑                      | 0,76                               | 5         | ↑                      | 1,34                         | 4                | 1                             | 5,97  | -3,83                              | -3,83     |
| R761S          | ↑                      | 0,68                               | Unfavourable | ↓                      | 1,38                               | Favourable   | ↓                      | -1,68                              | 35        | ↓                      | -0,06                        | 67               | 0,994                         | 67,69 | 1,28                               | -0,50     |
| M762T          | ↑                      | 1,26                               | Favourable   | ↑                      | 2,59                               | Favourable   | ↓                      | -0,63                              | 37        | ↓                      | -0,63                        | 33               | 0,795                         | 25,50 | -0,26                              | -0,26     |
| L763F          | ↓                      | -2,61                              | Favourable   | ↓                      | -2,39                              | Unfavourable | ↓                      | -0,47                              | 0,1       | ↑                      | 0,45                         | 14               | 1                             | 0,55  | -0,18                              | -0,18     |
| Y764H          | ↓                      | -4,4                               | Favourable   | ↑                      | 0,89                               | Favourable   | ↓                      | -2,29                              | 4         | ↓                      | -0,97                        | 19               | 1                             | 21,50 | -1,81                              | -4,15     |
| Y764C          | ↑                      | 1,94                               | Favourable   | ↓                      | -0,30                              | Favourable   | ↑                      | 1,65                               | 4         | ↑                      | 2,78                         | 19               | 1                             | 21,53 | 1,27                               | -3,25     |
| F765L          | ↑                      | 2,06                               | Favourable   | ↑                      | 1,97                               | Favourable   | ↓                      | -0,28                              | 11,1      | ↓                      | -0,55                        | 0                | 1                             | 9,47  |                                    |           |
| P767S          | ↓                      | -0,49                              | Unfavourable | ↓                      | 0,89                               | Unfavourable | ↓                      | -1,1                               | 32        | ↓                      | -0,49                        | 32               | 1                             | 40,80 | -0,47                              | -1,48     |
| P767A          | ↓                      | -2,8                               | Favourable   | ↓                      | -1,27                              | Favourable   | ↑                      | 0,3                                | 32        | ↑                      | 0,44                         | 32               | 1                             | 40,80 | 0,29                               | -1,24     |
| D768Y          | ↑                      | 1,06                               | Unfavourable | ↓                      | 0,03                               | Favourable   | ↑                      | 1,88                               | 23        | ↓                      | -0,22                        | 31               | 1                             | 20,82 | -2,81                              | -2,81     |
| Q799E          | ↓                      | -1,19                              | Unfavourable | ↓                      | -0,69                              | Unfavourable | ↓                      | -1,66                              | 40        | ↓                      | -0,88                        | 96               |                               | 87,35 | -0,66                              | -0,66     |
| Q803R          | ↓                      | -0,4                               | Favourable   | ↑                      | 0,25                               | Favourable   | ↓                      | -0,26                              | 11        | ↓                      | -0,26                        | 44               | 0,986                         | 36,95 | -0,04                              | -3,73     |
| R841C          | ↑                      | 2,82                               | Unfavourable | ↓                      | -1,56                              | Unfavourable | ↑                      | 1,11                               | 18        | ↑                      | 1,11                         | 53               | 1                             | 53,28 |                                    |           |
| R841H          | ↑                      | 1,24                               | Unfavourable | ↑                      | 0,01                               | Unfavourable | ↑                      | 0,4                                | 18        | ↑                      | 0,40                         | 53               | 1                             | 53,28 |                                    |           |
| R841S          | ↑                      | 0,18                               | Unfavourable | ↑                      | 0,39                               | Unfavourable | ↓                      | -1,54                              | 18        | ↓                      | -1,58                        | 53               | 1                             | 53,28 |                                    |           |
| R841G          | ↓                      | -0,27                              | Unfavourable | ↓                      | -1,50                              | Unfavourable | ↓                      | -1,54                              | 18        | ↓                      | -3,25                        | 53               | 1                             |       |                                    |           |
| R855K          |                        |                                    |              |                        |                                    |              | ↓                      | -0,23                              | 68        | ↓                      | -0,23                        | 71               |                               |       | -4,61                              | -4,61     |
| R856C          | ↓                      | -0,41                              | Unfavourable | ↓                      | -1,72                              | Unfavourable | ↑                      | 0,47                               | 8         | ↓                      | -1,86                        | 8                | 1                             | 4,80  | 2,72                               | 2,72      |
| R856H          | ↓                      | -1,64                              | Unfavourable | ↓                      | -0,97                              | Unfavourable | ↓                      | -0,67                              | 8         | ↓                      | -2,12                        | 8                | 1                             | 4,80  | 14,08                              | 14,08     |

**Supplementary Table 4 (ST4): Bioinformatics analysis of PCa-linked mutations.**

| PCa     | CUPSAT              |                             |              |                     |                             |              | SDM                 |                             |           |             |                     |                             | PolyPhen program | Folding RaCe |       |         |         |
|---------|---------------------|-----------------------------|--------------|---------------------|-----------------------------|--------------|---------------------|-----------------------------|-----------|-------------|---------------------|-----------------------------|------------------|--------------|-------|---------|---------|
|         | DIMER               |                             |              | MONOMER             |                             |              | DIMER               |                             |           | MONOMER     |                     |                             |                  | Score        | Dimer | Monomer |         |
| Residue | Effect on stability | $\Delta\Delta G$ (Kcal/mol) | Torsion      | Effect on stability | $\Delta\Delta G$ (Kcal/mol) | Torsion      | Effect on stability | $\Delta\Delta G$ (Kcal/mol) | % Solvent | Disruption  | Effect on stability | $\Delta\Delta G$ (Kcal/mol) | % Solvent        | Disruption   | Score | Dimer   | Monomer |
| G684A   | ↓                   | -2,60                       | Unfavourable | ↑                   | 2,48                        | Unfavourable | ↑                   | 2,23                        | 30        | No-H – No-H | ↑                   | 2,23                        | 115              | No-H – No-H  | 0,916 | 0,04    | -1,09   |
| G751S   | ↓                   | -0,14                       | Unfavourable | ↑                   | 0,74                        | Unfavourable | -                   | 0,13                        | 1,2       | No-H - Sat  | -                   | 0,13                        | 1                | No-H - Sat   | 0,988 | 6,2     | 6,2     |
| F755L   | ↓                   | -2,38                       | Favourable   | ↓                   | -3,37                       | Favourable   | -                   | 0,29                        | 10        | No-H – No-H | -                   | 0,29                        | 29               | No-H – No-H  | 0,971 | -0,18   | -0,02   |
| T756A   | ↓                   | -0,18                       | Favourable   | ↑                   | 1,07                        | Favourable   | ↑                   | 2,21                        | 7         | Sat – No-H  | ↑                   | 1,97                        | 48               | Sat – No-H   | 0,196 | 0,48    | -0,92   |
| N757D   | ↑                   | 0,79                        | Favourable   | ↑                   | 1,44                        | Unfavourable | ↓                   | -0,68                       | 10        | No-H – No-H | ↓                   | -0,63                       | 41               | Sat - Sat    | 0,99  | 0,37    | -1,45   |
| V758A   | ↓                   | -2,15                       | Unfavourable | ↓                   | -1,41                       | Unfavourable | -                   | 0,23                        | 4         | No-H – No-H | -                   | -0,68                       | 14               | No-H – No-H  | 0,536 | -1,04   | -1,04   |
| V758I   | ↑                   | 0,81                        | Unfavourable | ↓                   | -0,24                       | Unfavourable | ↑                   | 0,59                        | 4         | No-H – No-H | ↑                   | 0,53                        | 14               | No-H – No-H  | 0,965 | 0,72    | 0,72    |
| S760P   | ↓                   | -5,45                       | Unfavourable | ↓                   | -3,12                       | Unfavourable | ↓                   | -8,87                       | 5         | Sat – No-H  | ↓                   | -8,72                       | 4                | Sat – No-H   | 0,999 | -4,34   | -4,34   |
| R761K   | ↓                   | -0,95                       | Favourable   | ↓                   | -0,26                       | Favourable   | -                   | 0,3                         | 35        | No-H – No-H | -                   | 0,09                        | 67               | Sat - Sat    | 0,047 |         |         |
| Y764C   | ↑                   | 1,94                        | Favourable   | ↓                   | -0,3                        | Favourable   | ↑                   | 2,78                        | 4         | No-H – No-H | ↑                   | 2,11                        | 19               | No-H - Sat   | 1     | 1,27    | -3,25   |
| Q799G   | ↓                   | -1,46                       | Favourable   | ↓                   | -1,76                       | Unfavourable | ↑                   | 0,77                        | 40        | No-H – No-H | ↑                   | 0,77                        | 96               | No-H – No-H  | 0,998 | 0,29    | 0,29    |
| I800T   | ↓                   | -10,7                       | Unfavourable | ↑                   | 2,42                        | Unfavourable | ↓                   | -2,06                       | 0         | No-H - Sat  | ↓                   | -3,08                       | 0                | UnSat – No-H | 0,999 | -1,78   | -1,78   |
| R847G   | ↓                   | -1,00                       | Unfavourable | ↓                   | -0,5                        | Unfavourable | ↓                   | -3,02                       | 25        | Sat – No-H  | ↓                   | -2,61                       | 28               | Sat – No-H   | 0,986 | -0,11   | -0,11   |



**Supplementary Table 5 (ST5): Functional data reported on PCa- and AIS-associated mutations clustering at the dimer interface.**

| Residue | Phenotype        | Ligand binding                                                   | Transactivation | Reference                                                                                                   |
|---------|------------------|------------------------------------------------------------------|-----------------|-------------------------------------------------------------------------------------------------------------|
| G684A   | PCa              |                                                                  | ↓               | Shi et al., 2002; Qi et al., 2013                                                                           |
| V685I   | CAIS             | Bmax zero                                                        |                 | Mebarki et al., 1993                                                                                        |
| C687R   | PAIS             |                                                                  |                 | Hiort et al., 1996                                                                                          |
| D691E   | PAIS             | WT                                                               | ↓               | Hughes et al., 2012                                                                                         |
| D691V   | CAIS             | KD for DHT is 4.5x > WT                                          | ↓               | Tadokoro et al., 2009                                                                                       |
| D696H   | CAIS             | Bmax low                                                         |                 | Ris-Stalpers et al., 1991                                                                                   |
| D696N   | MAIS, PAIS, CAIS | WT                                                               | ↓               | Ris-Stalpers et al., 1991; Jääskeläinen et al., 2006; Helsen et al., 2012                                   |
| D696V   | CAIS             |                                                                  |                 | Dork et al., 1998                                                                                           |
| D696Y   | CAIS             |                                                                  |                 | Audi et al., 2010                                                                                           |
| G751D   | CAIS             | Bmax very low                                                    | ↓               | Bevan et al., 1997                                                                                          |
| G751S   | PCa              |                                                                  | WT              | Shi et al., 2002                                                                                            |
| W752R   | PCa, CAIS        | Low to normal Bmax, KD > WT                                      |                 | Langley et al., 1998; Boehmer et al. 2001                                                                   |
| R753P   | CAIS             |                                                                  |                 | Hughes et al., 2012                                                                                         |
| R753Q   | CAIS             | KD for R1881 is 1.5x > WT.<br>Dissociation time is 12x > WT      | ↓               | Langley et al., 1998                                                                                        |
| F755L   | PCa, PAIS        | KD for DHT is 1.5x > WT                                          | ↓               | Shi et al., 2002; Tadokoro et al., 2009                                                                     |
| F755S   | MAIS, PAIS       | KD for DHT is 3x > WT                                            | ↓               | Tadokoro et al., 2009                                                                                       |
| F755V   | CAIS             | KD for DHT is 5x > WT                                            | ↓               | Tadokoro et al., 2009                                                                                       |
| T756A   | PCa              |                                                                  | ↓               | Hay and McEwan, 2012                                                                                        |
| N757D   | PCa              |                                                                  | ↓               | Hay and McEwan, 2012                                                                                        |
| N757S   | MAIS, PAIS       | KD for DHT is > WT                                               | ↓               | Giwerzman et al., 2001                                                                                      |
| V758A   | PCa              |                                                                  | WT              | Shi et al., 2002; Hay and McEwan, 2012; Qi et al., 2013                                                     |
| V758I   | PCa              |                                                                  | ↓               | Hay and McEwan, 2012                                                                                        |
| N759T   | PAIS             | WT                                                               | ↓               | Yong et al., 1998; Helsen et al., 2012                                                                      |
| S760F   | CAIS             | Bmax zero                                                        |                 | DeBellis et al., 1992                                                                                       |
| S760P   | PCa              |                                                                  | ↓               | Shi et al., 2002; Hay and McEwan, 2012                                                                      |
| S760Y   | CAIS             |                                                                  |                 | Hughes et al., 2012                                                                                         |
| R761S   | PAIS             |                                                                  | ↑               | Helsen et al., 2012                                                                                         |
| M762T   | PAIS             |                                                                  |                 | Ledig et al., 2005                                                                                          |
| L763F   | CAIS             | No binding                                                       |                 | Bevan et al., 1997                                                                                          |
| Y764C   | PCa, PAIS        | Normal KD/High KD. Dissociation half life (3H)R1881 = 35% of WT. | ↓               | Murono et al., 1995; Jääskeläinen et al., 2006; Hay and McEwan, 2012; Langley et al., 1998                  |
| Y764H   | CAIS             | KD is > WT. Dissociation half life (3H)R1881 = 23% of WT.        | ↓               | Langley et al., 1998                                                                                        |
| F765L   | CAIS             | Bmax low. Abnormal dissociation rate.                            | ↓               | Szafran et al., 2009; Marcelli et al., 1994                                                                 |
| P767A   | CAIS             | WT                                                               | ↓               | Helsen et al., 2012                                                                                         |
| P767S   | CAIS             |                                                                  |                 | Hay and McEwan, 2012                                                                                        |
| D768E   | CAIS             | Bmax very low                                                    |                 | Lobaccaro et al., 1993; Melo et al., 1998                                                                   |
| D768Y   | CAIS             |                                                                  |                 | Taes et al., 2009                                                                                           |
| Q799E   | PCa, MAIS, PAIS  | WT                                                               | WT/↓            | Castagnaro et al., 1993; Shi et al., 2002; Jääskeläinen et al., 2006; Hay and McEwan, 2012; Qi et al., 2013 |
| I800T   | PCa              |                                                                  |                 | Sanchez et al., 2006                                                                                        |
| Q803R   | PAIS             |                                                                  |                 | Chavez et al., 2001                                                                                         |
| R841C   | PAIS             | KD for R1881 is 3x > WT                                          | ↓               | Georget et al., 1998                                                                                        |
| R841G   | PAIS             | Bmax low                                                         | ↓               | Giwerzman et al., 1998                                                                                      |
| R841H   | PAIS, CAIS       | Bmax low, KD for DHT is 15x > WT                                 |                 | Marcelli et al., 1994                                                                                       |
| R841S   | PAIS             |                                                                  |                 | Mazen et al., 2004                                                                                          |
| R847G   | PCa              |                                                                  | WT              | Shi et al., 2002                                                                                            |
| R855K   | PAIS             | Bmax low                                                         |                 | McPhaul et al., 1992                                                                                        |
| R856C   | CAIS             | No binding                                                       | Inactive        | Murono et al., 1995; Elhaji et al., 2004                                                                    |
| R856H   | MAIS, PAIS, CAIS | Normal Bmax and dissociation rate, KD for R1881 is 2x > WT       | ↓               | Elhaji et al., 2004; Jääskeläinen et al., 2006                                                              |

## Supplementary Notes

The major implications of the current structure for disease-associated point mutations are summarized below.

Mutations associated with androgen insensitivity syndromes:

In addition to the large number of AIS-linked mutations that cluster at the core of the AR-LBD dimer interface, some variants affect the “upper” L5-6 and L7-8 loops (N759T, S760F/Y, R761S, M762T, Y764C/H, P767S/A and Q799E) or the lower area of the interface (V685I, C687R, D691V/E, D696N/Y/V/L and D768Y) (Figures 5a,c, and Supplementary Tables 3,5). Several of these AIS-associated mutations may lead to local structural disorder of the AR monomer, which might explain their pathogenicity (e.g. W752R, R753P, S760F/Y, L763F and R856C) (Supplementary Figure 3).

Most reported replacements, however, affect residues that are well exposed in the AR-LBD monomer and are predicted to be neutral or even favorable for its structure, but are involved in important inter-monomer contacts, and would therefore compromise the stability of the dimer (Supplementary Figure 3 and Supplementary Table 3). Mutations F755L and F755V, in particular, have an interesting correlation with AIS severity: the Phe→Leu exchange is associated with a less severe PAIS phenotype, while introduction of the related aliphatic residue, Val, results in CAIS<sup>15</sup> (see also Supplementary Table 5). Although both leucine and valine would be equally well tolerated at this position in monomeric AR-LBD, inspection of the current structure reveals that a Leu side chain could still engage in vdW interactions with residue P802 from the adjacent monomer, albeit weaker than those formed by the bulkier wild-type Phe (Figure 2d). In contrast, a smaller Val side chain cannot participate in such interactions, and therefore the F755V mutant is predicted to remain in a monomeric state, disrupting biological activities of the receptor and explaining the complete female phenotype of carriers of this mutation. In a similar manner, loss of important H-bonds across the dimer axis would compromise dimer formation and/or stability (Figure 2e), which explains the deleterious impact of replacing residue R761 by Ser (reported in PAIS patients) and of the N757 exchange to Ser (MAIS/PAIS). Finally, impaired vdW interactions across the dimer interface (Figure 2d) are likely to underlie the CAIS phenotype in carriers of the P767A/S mutations. Indeed, we could demonstrate that the P767A variant interferes with dimer formation, in spite of retained ligand binding ability (see Figure 4c and main text for details).

Mutations associated with metastatic prostate cancer:

Some of these AR variants (in particular R847G, but also S760P and R841G) are predicted to destabilize the LBD monomer, while mutations that cluster in the central part of the interface are more preservative of structural integrity and ligand binding: G684S, G751S, Q799G, and I800T are predicted to stabilize the monomer. On the other hand, PCa-associated mutations that affect residues exposed on H5 (F755L, T756A, N757D and V758A/I), or neighboring areas (R761K, Y764C) are likely to be neutral regarding the structure of the monomer (Figures 5b,c, Supplementary Figure 3, and Supplementary Tables 4-5). For the exposed structure-preserving mutations T756A, N757D, V758I and Y764C, all bioinformatics tools predict enhanced dimerization (Supplementary Table 4). In the cases of T756A and Y764C the smaller size of the mutant side chains might facilitate a tighter dimer assembly. On the other hand, the V758I exchange is predicted to stabilize the AR-LBD dimer thanks to additional vdW interactions of the bulkier I758 side chain with residues M763 and Y764 from the neighboring monomer. Interestingly, mutation Y764C strongly enhanced the activity of the AR in our functional studies (Figure 5), which is in accordance with the general belief that overactive AR can lead to therapy resistance in advanced PCa<sup>16</sup>.

## Supplementary References

- 1 Sack, J. S. *et al.* Crystallographic structures of the ligand-binding domains of the androgen receptor and its T877A mutant complexed with the natural agonist dihydrotestosterone. *Proc. Natl. Acad. Sci. U.S.A.* **98**, 4904-4909 (2001).
- 2 Hur, E. *et al.* Recognition and accommodation at the androgen receptor coactivator binding interface. *PLoS Biol.* **2**, e274 (2004).
- 3 Estébanez-Perpiñá, E. *et al.* The molecular mechanisms of coactivator utilization in ligand-dependent transactivation by the androgen receptor. *J. Biol. Chem.* **280**, 8060-8068 (2005).
- 4 He, B. *et al.* Structural basis for androgen receptor interdomain and coactivator interactions suggests a transition in nuclear receptor activation function dominance. *Mol. Cell* **16**, 425-438 (2004).
- 5 Bohl, C. E., Gao, W., Miller, D. D., Bell, C. E. & Dalton, J. T. Structural basis for antagonism and resistance of bicalutamide in prostate cancer. *Proc. Natl. Acad. Sci. U. S. A.* **102**, 6201-6206 (2005).
- 6 Salvati, M. E. *et al.* Structure based approach to the design of bicyclic-1H-isoindole-1,3(2H)-dione based androgen receptor antagonists. *Bioorg. Med. Chem. Lett.* **15**, 271-276 (2005).
- 7 Sun, C. *et al.* Discovery of potent, orally-active, and muscle-selective androgen receptor modulators based on an *N*-aryl-hydroxybicyclohydantoin scaffold. *J. Med. Chem.* **49**, 7596-7599 (2006).
- 8 Wang, F. *et al.* Structure of the ligand-binding domain (LBD) of human androgen receptor in complex with a selective modulator LGD2226. *Acta Crystallogr. Sect. F Struct. Biol. Cryst. Commun.* **62**, 1067-1071 (2006).
- 9 Estébanez-Perpiñá, E. *et al.* A surface on the androgen receptor that allosterically regulates coactivator binding. *Proc. Natl. Acad. Sci. U.S.A.* **104**, 16074-16079 (2007).
- 10 Zhou, X. E. *et al.* Identification of SRC3/AIB1 as a preferred coactivator for Hhrmone-activated androgen receptor. *J. Biol. Chem.* **285**, 9161-9171 (2010).
- 11 Hsu, C.-L. *et al.* Identification of a new androgen receptor (AR) co-regulator BUD31 and related peptides to suppress wild-type and mutated AR-mediated prostate cancer growth via peptide screening and X-ray structure analysis. *Mol. Oncol.* **8**, 1575-1587 (2014).
- 12 Xu, K. *et al.* Regulation of androgen receptor transcriptional activity and specificity by RNF6-induced ubiquitination. *Cancer Cell* **15**, 270-282 (2009).
- 13 Lin, H.-K., Yeh, S., Kang, H.-Y. & Chang, C. Akt suppresses androgen-induced apoptosis by phosphorylating and inhibiting androgen receptor. *Proc. Natl. Acad. Sci. U.S.A.* **98**, 7200-7205 (2001).

- 14 Matias, P. M. *et al.* Structural evidence for ligand specificity in the binding domain of the human androgen receptor: Implications for pathogenic gene mutations *J. Biol. Chem.* **275**, 26164-26171 (2000).
- 15 Tadokoro, R., Bunch, T., Schwabe, J. W. R., Hughes, I. A. & Murphy, J. C. Comparison of the molecular consequences of different mutations at residue 754 and 690 of the androgen receptor (AR) and androgen insensitivity syndrome (AIS) phenotype. *Clin. Endocrinol.* **71**, 253-260 (2009).
- 16 Attard, G. *et al.* Prostate cancer. *Lancet* **387**, 70-82 (2016).
